# Supplementary material
Source: Springer Nature journal article supplement (https://www.springermedizin.de/resource/supplementary/12885_2007_943_MOESM3_ESM.pdf/9471842)
Supplement: MOESM3 [file 9471842]

## Unadjusted analysis of histopathologic prognostic factors

|                                        |                  | No of patients | Median survival (years) | HR   | 95% CI for HR | p-value |
|----------------------------------------|------------------|----------------|-------------------------|------|---------------|---------|
| <b>A. R0 and R1 resections (n=114)</b> |                  |                |                         |      |               |         |
| R-status                               | R0 (ref)         | 74             | 4.4                     |      |               |         |
|                                        | R1               | 40             | 1.2                     | 2.82 | 1.78–4.49     | < 0.001 |
| Retroperitoneal margin                 | free (ref)       | 82             | 2.8                     |      |               |         |
|                                        | involved         | 32             | 1.2                     | 2.61 | 1.63–4.18     | < 0.001 |
| Pancreatic neck margin                 | free (ref)       | 99             | 2.2                     |      |               |         |
|                                        | involved         | 15             | 1.2                     | 2.45 | 1.35–4.43     | 0.003   |
| Distal bile duct margin                | free (ref)       | 112            | 1.9                     |      |               |         |
|                                        | involved         | 2              | 0.6                     | 8.27 | 1.88–36.4     | 0.005   |
| Origin                                 | ampulla (ref)    | 41             | 4.9                     |      |               | < 0.001 |
|                                        | duodenum         | 16             | 2.3                     | 1.09 | 0.50–2.38     | 0.822   |
|                                        | distal bile duct | 17             | 2.5                     | 1.20 | 0.58–2.49     | 0.615   |
|                                        | pancreas         | 40             | 1.2                     | 3.15 | 1.79–5.53     | < 0.001 |
| Lymph nodes                            | N0 (ref)         | 49             | NR                      |      |               |         |
|                                        | N1               | 65             | 1.3                     | 3.30 | 1.97–5.53     | < 0.001 |
| Poor differentiation                   | no (ref)         | 71             | 3.7                     |      |               |         |
|                                        | yes              | 43             | 1.2                     | 2.59 | 1.64–4.11     | < 0.001 |
| Vessel involvement                     | no (ref)         | 71             | 3.7                     |      |               |         |
|                                        | yes              | 43             | 1.3                     | 2.80 | 1.76–4.47     | < 0.001 |
| Perineural infiltration                | no (ref)         | 52             | 5.4                     |      |               |         |
|                                        | yes              | 62             | 1.3                     | 3.17 | 1.93–5.19     | < 0.001 |
| Tumour size (continuous)               | diameter (cm)    | 114            | 1.8                     | 1.27 | 1.08–1.48     | 0.003   |
| <b>B. R0 resections (n=74)</b>         |                  |                |                         |      |               |         |
| Origin                                 | ampulla (ref)    | 31             | NR                      |      |               | < 0.001 |
|                                        | duodenum         | 14             | 5.0                     | 1.51 | 0.59–3.84     | 0.389   |
|                                        | distal bile duct | 7              | NR                      | 1.00 | 0.28–3.55     | 0.998   |
|                                        | pancreas         | 22             | 1.3                     | 4.71 | 2.13–10.4     | < 0.001 |
| Lymph nodes                            | N0 (ref)         | 41             | NR                      |      |               |         |
|                                        | N1               | 33             | 1.7                     | 2.89 | 1.51–5.55     | 0.001   |
| Poor differentiation                   | no (ref)         | 53             | 5.4                     |      |               |         |
|                                        | yes              | 21             | 1.3                     | 2.94 | 1.54–5.62     | 0.001   |
| Vessel involvement                     | no (ref)         | 54             | 5.4                     |      |               |         |
|                                        | yes              | 20             | 1.3                     | 2.43 | 1.24–4.75     | 0.009   |
| Perineural infiltration                | no (ref)         | 43             | 6.0                     |      |               |         |
|                                        | yes              | 31             | 1.7                     | 2.38 | 1.27–4.48     | 0.007   |
| Tumour size (continuous)               | diameter (cm)    | 74             | 4.3                     | 1.23 | 1.00–1.50     | 0.045   |

HR, hazard ratio. HR > 1 indicates increased probability of death compared to the reference group

ref, reference for categorical variables

NR, not reached
